# Supplementary material
Source: publisher figshare collection journal article supplement (https://acs.figshare.com/ndownloader/files/4631422)
Supplement: Supplementary file 1 [file 4631422]

# Supporting Information of Multifunctional Magnetic Silver Nanoshells with Sandwich-like Nanostructures

*Minghai Chen, Yong Nam Kim, Hyeok Moo Lee, Cuncheng Li, and Sung Oh Cho\**

Department of Nuclear and Quantum Engineering, Korea Advanced Institute of  
Science and Technology (KAIST), Daejeon 305-701, Republic of Korea.

Corresponding Author: Professor Sung Oh Cho, E-mail: socho@kaist.ac.kr, Tel: +82-42-869-3823

## The detailed characterization of Fe<sub>3</sub>O<sub>4</sub> nanoparticles

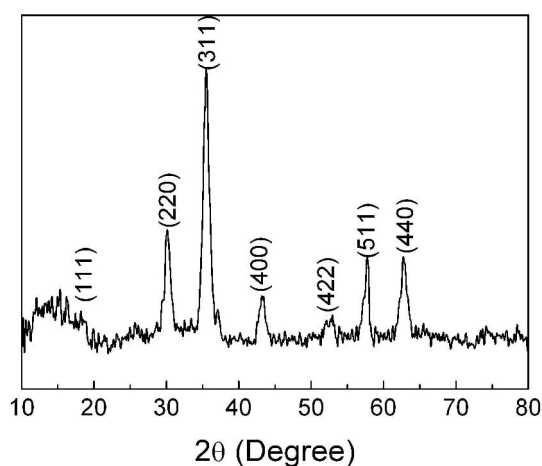

Figure S1. XRD pattern of Fe<sub>3</sub>O<sub>4</sub> nanoparticles. All the peaks are well consistent with the standard PDF card No. 65-3107.

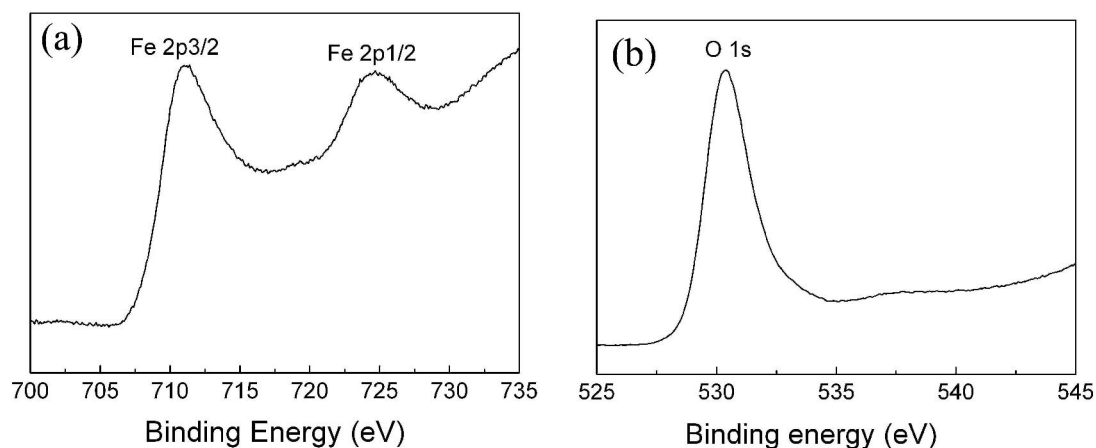

Figure S2. XPS spectra of  $\text{Fe}_3\text{O}_4$  nanoparticles. The binding energy at 711.08 and 724.1 eV are corresponding to Fe 2p<sub>3/2</sub> and Fe 2p<sub>1/2</sub>, respectively, which agree with the values of  $\text{Fe}_3\text{O}_4$  in literature.<sup>1</sup> Additionally, for the peaks shape, the absence of the shoulder peak between two peaks that correspond to  $\gamma\text{-Fe}_2\text{O}_3$  indicates the characteristic of  $\text{Fe}_3\text{O}_4$ .<sup>1</sup>

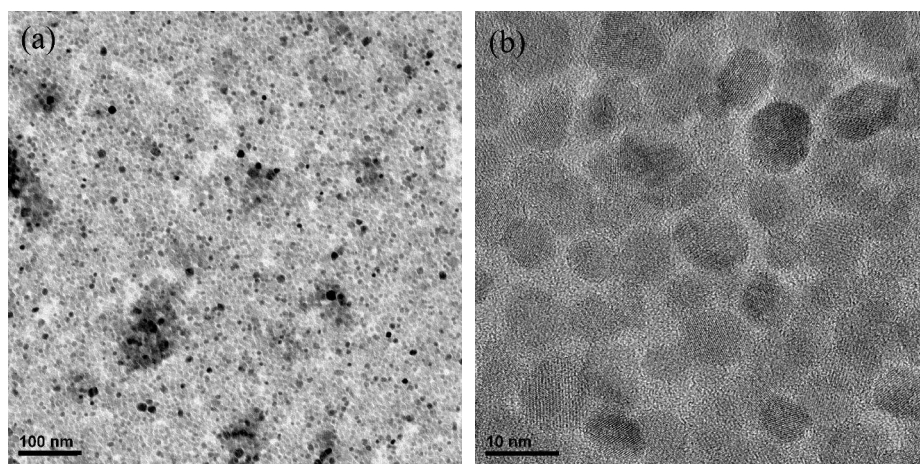

Figure S3. TEM images of  $\text{Fe}_3\text{O}_4$  nanoparticles. The average diameter is about 8 nm.

## Reference

- (1) Wang, L. Y.; Luo, J.; Fan, Q.; Suzuki, M.; Suzuki, I. S.; Engelhard, M. H.; Lin, Y.; Kim, N.; Wang, J. Q.; Zhong, C. J. *J. Phys. Chem. B* **2005**, *109*, 21593.
